# Supplementary material
Source: PubMed Central journal article supplement (PMC4251521)
Supplement: am505689g_si_001.pdf [file am505689g_si_001.pdf]

# Detection of Bacteria Using Inkjet-Printed Enzymatic Test Strips

*Brian Creran,<sup>†</sup> Xiaoning Li,<sup>†</sup> Bradley Duncan,<sup>†</sup> Chang Soo Kim,<sup>†</sup> Daniel F. Moyano,<sup>†</sup> and  
Vincent M. Rotello<sup>\*,†</sup>*

<sup>†</sup> Department of Chemistry, University of Massachusetts, Amherst, MA 01003, USA.

**RECEIVED DATE (to be automatically inserted after your manuscript is accepted if  
required according to the journal that you are submitting your paper to)**

V. M. R.: E-mail, [rotello@chem.umass.edu](mailto:rotello@chem.umass.edu); Tel., 1-413-545-2058; Fax, 1-413-545-4490

## **Supporting Information**

### **Sensor Construction and Storage**

The paper substrate was placed into the standard paper feed of the printer. For our work, patterning was done through the use of Microsoft PowerPoint software. A large checkerboard square pattern with two alternating materials was created to maximize the amount of sensors printed on each paper. In order to print only the channel of interest, the color of the letter has to match the channel printed. To print only the magenta channel, the RGB value must be set to (255,0,255). For cyan channel printing, (0,255,255) must be used and for yellow channel (255,255,0) must be used. The image color management (ICM) also must be turned off in the Advanced tab of the printer properties to ensure no mixing of the channels occurs. Before printing, the print heads were cleaned two times using the “Head Cleaning” function in the Maintenance tab of the printer properties to ensure that the channels were filled. After printing, the sensor sheet was cut into small circles through the use of a standard hole punch

and glued onto a 1 cm by 4 cm strip of card stock paper to provide rigidity to the sensor. Completed strips were kept refrigerated for up to week before being used in our study.

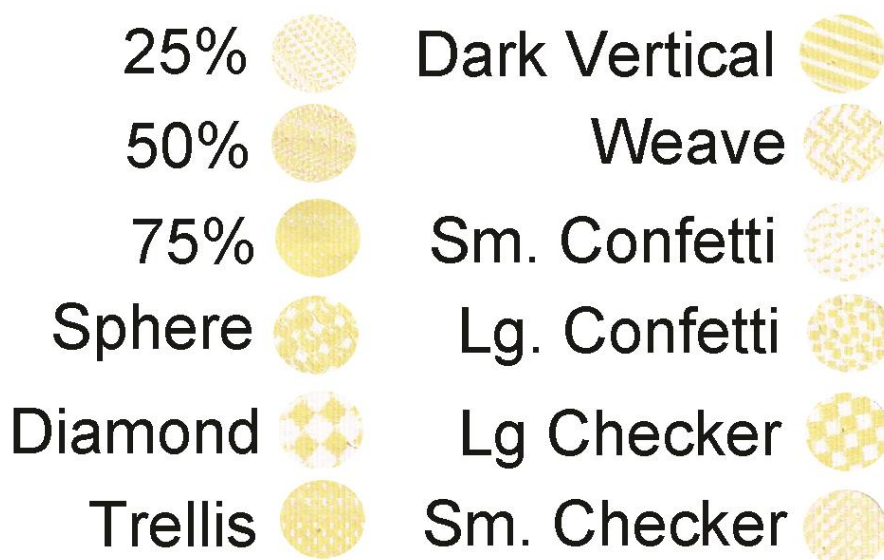

**Figure S1.** Representative patterned strips before immersion.

### **Profile Image Analysis**

To quantitatively investigate the change in color across the sensor strip, one scanned strip image per pattern was analyzed using ImageJ software. By taking a representative 70 pixels of the image, a RGB Profile Plot was generated whose RGB values were converted to CMY color space. To compare the color response from pattern to pattern, we took the average yellow response of the strip before immersion and subtracted it from the average magenta response after dipping. Figure S2 shows that the small checker is as good as the diamond pattern but better than any of the other sensor designs. To quantify heterogeneity, we graphed the standard deviation of responses across the sensor surface. Figure S3 shows that the diamond pattern has by far the highest variation across the surface of all patterned surfaces. Taking these two graphs together indicates that the small checker pattern is the best to use for our system. The pattern that we used in PowerPoint can be seen in Figure S4.

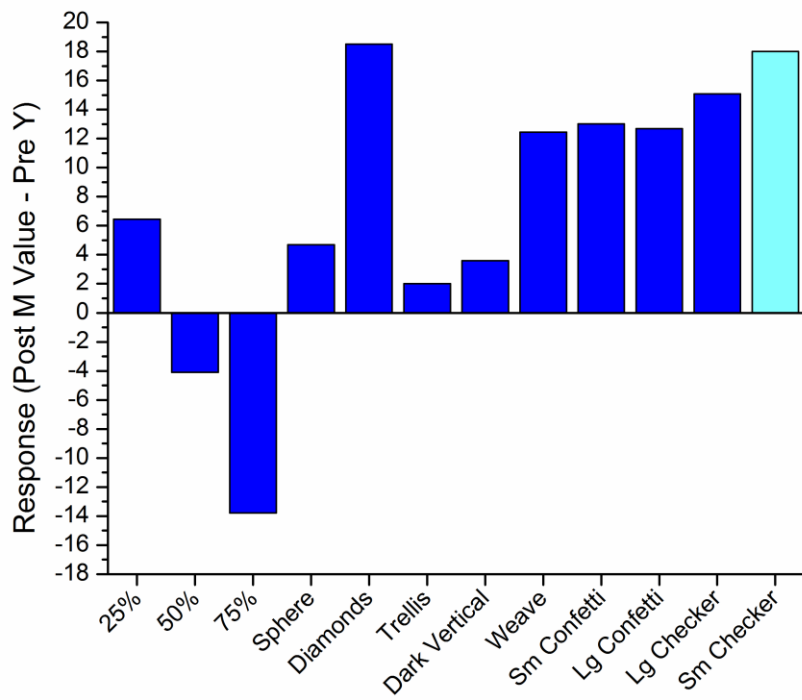

**Figure S2.** Change in color response of the 12 sensor patterns after immersion.

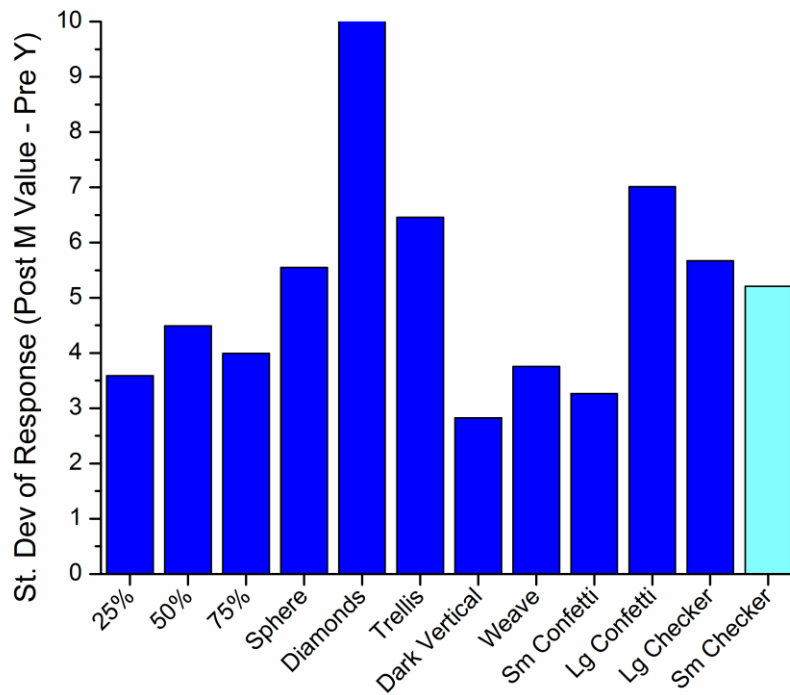

**Figure S3.** Variance in the color change of the 12 sensor designs.

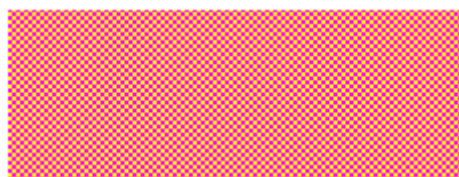

**Figure S4.** Checkboard pattern used in Microsoft PowerPoint to generate the test strip functionality.

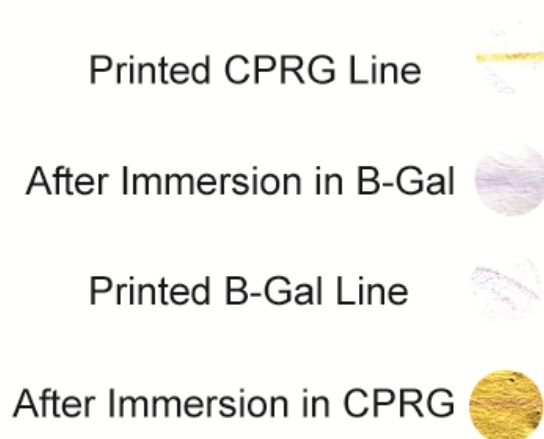

**Figure S5.** Motility experiments of both substrate and enzyme along the paper substrate.

#### **CPRG Leaching Analysis**

To quantitate the amount of CPRG that could possibly leach out into the analyte mixture, we incubated a completed test strip with 50  $\mu\text{L}$  of MilliQ water. After five minutes, the strip was removed and 50  $\mu\text{L}$  of a 0.5 nM  $\beta$ -galactosidase solution was added to the solution. The solution was incubated for 5 minutes and the color change was assessed at the 595 nm wavelength similar to our previous work<sup>1</sup>. A control solution was also analyzed containing enzyme and MilliQ water. Visually, both solutions appeared clear and no significant difference was seen in the absorbance values.

| <u>Solution</u>       | <u>Absorbance at 595 nm</u> |
|-----------------------|-----------------------------|
| Control (No Strip)    | .07±.01                     |
| Strip Incubated Water | .08±.01                     |

**Table S1.** Absorbance values of the analyte solution after incubating with the sensor

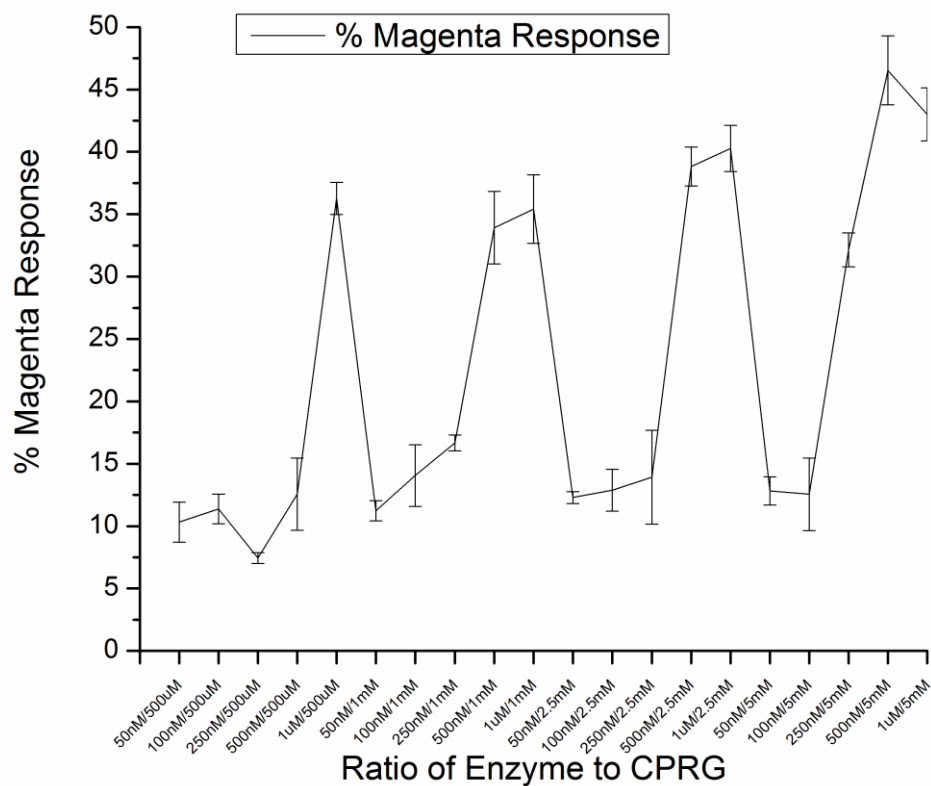

**Figure S6.** – Magenta response of the scanned test strips against the ratio of enzyme to printed CPRG. Error bars represent 6 measurements of each test strip.

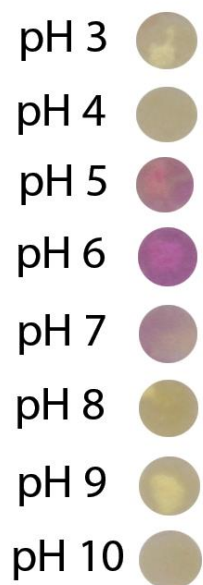

**Figure S7.** NP-free test strip response against pH buffered MilliQ water solutions.

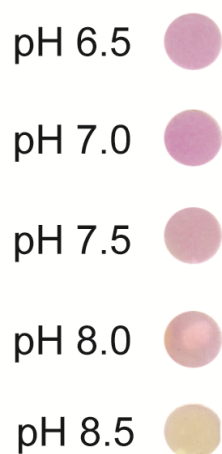

**Figure S8.** NP-free test strip response against pH buffered drinking water solutions at relevant pH levels.

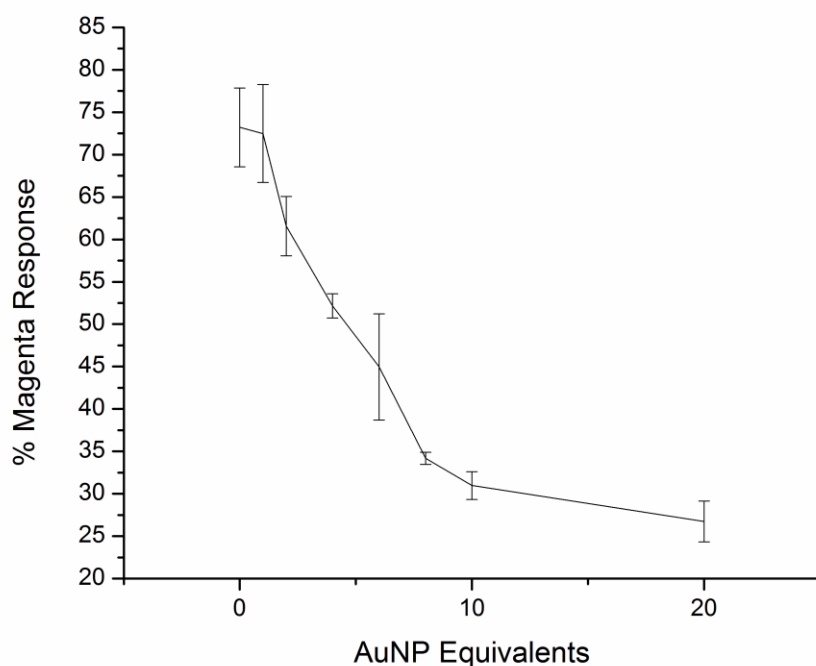

**Figure S9.** Magenta response against the amount of AuNPs equivalents needed to inhibit the enzyme. Error bars represent 6 measurements of each test strip.

### **Bacteria Culturing**

Strains of both *Escherichia coli* (*E. coli* XL1 Blue; Gram-negative) and *Bacillus subtilis* (*B. subtilis*; Gram-positive) bacteria were cultured in lysogeny broth (LB) growth medium and successively washed via centrifugation with 5 mM PBS (pH 7.4). Both samples of each bacteria were adjusted to an OD of 1.0 at the 600nm wavelength, which relates to  $\sim 10^8$  bacteria/mL. These bacteria were used within 48 hours after purification to ensure a viable sample.

| <u>Log<br/>(Concentration)</u> | <u>B. Sub</u> | <u>St Dev</u> | <u>E. Coli</u> | <u>St Dev</u> |
|--------------------------------|---------------|---------------|----------------|---------------|
| 7                              | 28.5          | 1.64317       | 38.5           | 5.95819       |
| 6                              | 25.6667       | 2.87518       | 35.8333        | 7.19491       |
| 5                              | 27.5          | 0.83666       | 33.3333        | 3.26599       |
| 4                              | 26.3333       | 1.50555       | 34.1667        | 1.94079       |
| 3                              | 14.3333       | 8.4538        | 30             | 1.67332       |
| 2                              | 19.1667       | 3.0605        | 30.6667        | 1.8619        |
| 1                              | 23            | 1.26491       | 29.1667        | 0.75277       |
| 0                              | 22.3333       | 1.63299       | 28.6667        | 1.63299       |

**Table S2.** Cyan average percentages along with the standard deviation of 6 chosen spots taken from the scanned image of each test strip versus concentration of bacteria.

| <u>Log<br/>(Concentration)</u> | <u>B. Sub</u> | <u>St Dev</u> | <u>E. Coli</u> | <u>St Dev</u> |
|--------------------------------|---------------|---------------|----------------|---------------|
| 7                              | 67.6667       | 3.9833        | 80.5           | 2.73861       |
| 6                              | 57.6667       | 2.58199       | 84.3333        | 2.80476       |
| 5                              | 68            | 2.68328       | 63             | 4.38178       |
| 4                              | 53.6667       | 2.50333       | 62.5           | 3.67423       |
| 3                              | 41.6667       | 3.38625       | 50.6667        | 3.38625       |
| 2                              | 22.3333       | 6.7429        | 33.1667        | 1.16905       |
| 1                              | 26.3333       | 1.0328        | 31             | 0.89443       |
| 0                              | 23.1667       | 1.47196       | 31.5           | 1.04881       |

**Table S3.** Magenta average percentages along with the standard deviation of 6 chosen spots taken from the scanned image of each test strip versus concentration of bacteria.

| <u>Log<br/>(Concentration)</u> | <u>B. Sub</u> | <u>St Dev</u> | <u>E. Coli</u> | <u>St Dev</u> |
|--------------------------------|---------------|---------------|----------------|---------------|
| 7                              | 9.66667       | 2.50333       | 23.3333        | 3.32666       |
| 6                              | 11.5          | 4.03733       | 14.1667        | 9.9482        |
| 5                              | 9.5           | 3.44964       | 35.1667        | 4.70815       |
| 4                              | 24.5          | 2.16795       | 38.6667        | 1.50555       |
| 3                              | 26            | 8.31865       | 46.1667        | 1.47196       |
| 2                              | 50.8333       | 1.94079       | 63             | 7.58947       |
| 1                              | 51.3333       | 2.87518       | 63.5           | 2.25832       |
| 0                              | 58.1667       | 2.99444       | 63.6667        | 3.26599       |

**Table S4.** Yellow average percentages along with the standard deviation of 6 chosen spots taken from the scanned image of each test strip versus concentration of bacteria.



| <u>Concentration</u> | <u>% Cyan</u> | <u>St Dev</u> |
|----------------------|---------------|---------------|
| 200                  | 40.1667       | 0.98319       |
| 150                  | 26.3333       | 5.20256       |
| 100                  | 27.6667       | 1.21106       |
| 75                   | 26.8333       | 2.99444       |
| 50                   | 28.5          | 1.51658       |
| 25                   | 21.1666       | 1.329         |
| 10                   | 21.6667       | 6.121         |
| 0                    | 14.3333       | 2.80476       |

**Table S5.** Cyan average percentages along with the standard deviation of 6 chosen spots taken from the scanned image of each test strip versus salt concentration.

| <u>Concentration</u> | <u>%<br/>Magenta</u> | <u>St Dev</u> |
|----------------------|----------------------|---------------|
| 200                  | 78.6667              | 4.67618       |
| 150                  | 74.6667              | 3.20416       |
| 100                  | 38                   | 1.89737       |
| 75                   | 30.6667              | 4.2269        |
| 50                   | 33.6667              | 2.42212       |
| 25                   | 23.1667              | .983192       |
| 10                   | 22.3333              | 6.53197       |
| 0                    | 16.6667              | 3.26599       |

**Table S6.** Magenta average percentages along with the standard deviation of 6 chosen spots taken from the scanned image of each test strip versus salt concentration.

| <u>Concentration</u> | <u>%<br/>Yellow</u> | <u>St Dev</u> |
|----------------------|---------------------|---------------|
| 200                  | 28.6667             | 3.55903       |
| 150                  | 16                  | 8.50882       |
| 100                  | 53.5                | 4.72229       |
| 75                   | 63                  | 5.32917       |
| 50                   | 61.3333             | 4.17931       |
| 25                   | 65.5                | 6.156         |
| 10                   | 78.6667             | 9.75021       |
| 0                    | 53.5                | 3.61939       |

**Table S7.** Yellow average percentages along with the standard deviation of 6 chosen spots taken from the scanned image of each test strip versus salt concentration.

MilliQ Water   $10^8$  Bacteria/mL 

**Figure S10.** Visual comparison of test strips where  $\beta$ -gal was not printed between a strip immersed in MilliQ water (Left) and concentrated *E. coli* XL1 bacteria (Right)

| <u>Metal Used</u>      | <u>Inhibition Concentration</u> | <u>Maximum Acceptable Concentration for Drinking Water</u> |
|------------------------|---------------------------------|------------------------------------------------------------|
| Copper                 | 5 mg/mL                         | 1.3 mg/mL                                                  |
| Lead                   | >20000 ppb                      | 15 ppb                                                     |
| Zinc                   | >20000 ppm                      | 20 ppm                                                     |
| Cadmium                | 5 mg/mL                         | .005 mg/mL                                                 |
| Sulfate                | >1 g/L                          | 250 mg/L                                                   |
| Sodium Dodecyl Sulfate | >4 mg/L                         | 1.0 mg/L                                                   |

**Table S8.** Concentrations at which the test strips respond to several common water contaminants as well as the current water regulations for that. Note that the maximum sodium dodecyl sulfate level is for all foaming agents in water and is not specific for this chemical.

References:

- 1.) Miranda, O. R.; Li, X.; Garcia-Gonzalez, L.; Zhu, Z.-J.; Yan, B.; Bunz, U. H. F.; Rotello, V. M. Colorimetric Bacteria Sensing Using a Supramolecular Enzyme–Nanoparticle Biosensor. *J. Am. Chem. Soc.* **2011**, *133*, 9650-9653.
